# Supplementary material
Source: PubMed Central journal article supplement (PMC4228884)
Supplement: SD2.pdf [file SD2.pdf]

SUPPLEMENTAL VIDEO 1. This video shows the skin biopsy being performed with a punch in two patients. Cleaning of the lesion as well as the local anesthesia done before performing the biopsy are not shown.

SUPPLEMENTAL VIDEO 2. This video illustrates Press-Imprint-Smear being made from biopsy specimens from Supplemental Video 1.
